# Supplementary material
Source: Research Square preprint supplement (doi:10.21203/rs.3.rs-10271276/v1)
Supplement: Supplementary file 1 [file c0d25bd3e9a753f84037d305.docx]

| **Variable** | **N (%)** |
| --- | --- |
| Exhaustion | 101 (53.2) |
| Weight loss | 42 (22.1) |
| Low physical activity | 3 (1.6) |
| Low grip strength | 82 (43.2) |
| Low gait speed | 26 (13.7) |

**Table S1: Physical Frailty Phenotype variables by domain**

**Table S2: Edmonton Frail Scale variables by domain**

| **Variable** | | **N (%)** |
| --- | --- | --- |
| Cognition | 1 point | 47 (24.7) |
| 2 points | 8 (4.2) |
| Self-perceived general health status | Fair (1 point) | 69 (36.3) |
| Poor (2 points) | 45 (23.7) |
| Hospital admissions | 1-2 (1 point) | 61 (32.1) |
| >2 (2 points | 16 (8.4) |
| Functional independence | Assistance with 2-4 ADLS | 46 (24.2) |
| Assistance >4 ADLS | 21 (11.1) |
| Social support | Some of the time | 21 (11.1) |
| None of the time | 1 (0.5) |
| Medication use | | 169 (88.9) |
| Medication compliance | | 68 (35.8) |
| Nutrition | | 77 (40.5) |
| Mood | | 84 (44.2) |
| Continence | | 23 (12.1) |
| Functional performance (TGUT) | 10-20 seconds (1 point) | 47 (24.7) |
| >20 seconds or unable | 5 (2.6) |

ADLs – Activities of Daily Living; TGUT – Timed Get up and Go

**Table S3: FRAIL scale variables by domain**

| **Variable** | **N (%)** |
| --- | --- |
| Fatigue | 96 (50.5%) |
| Resistance | 27 (14.2%) |
| Ambulation | 21 (11.1%) |
| Loss of weight | 39 (20.5%) |
| Co-morbidity | 2 (1.1%) |
